# Supplementary material for: egc Superantigens Impair Monocytes/Macrophages Inducing Cell Death and Inefficient Activation
Source: PubMed Central journal article supplement (PMC6974467; doi:10.3389/fimmu.2019.03008), 2020-01-15

## Supplementary data

**SP Table 1.** Specific primers for SAg genes evaluation by PCR

| Gen       | Primers                   | Tm (°C) |
|-----------|---------------------------|---------|
| tsst1 PR  | TTTCCAATAACCACCCGTT       | 57,35   |
| ttst 1 PF | ATGGCAGCATCAGCTTGATA      | 54,55   |
| nuc PR    | AGCCAAGCCTTGACGAACTAAAGC  | 63,88   |
| nuc PF    | GCGATTGATGGTGATACGGTT     | 58,79   |
| hsp60 PR  | CCATAGCTTCTGAAATATAGCG    | 54,62   |
| hsp60 PF  | GGTTTACGACAAGGTATCGAC     | 56,48   |
| sea PR    | GAACCTTCCCATCAAAAACA      | 53,96   |
| sea PF    | TTGGAAACGGTTAAAACGAA      | 51,14   |
| seb PR    | GCAGGTACTCTATAAGTGCC      | 55,05   |
| seb PF    | TCGCATCAAACCTGACAAACG     | 57,34   |
| sec PR    | AAATCGGATTAACATTATCC      | 49,60   |
| sec PF    | GACATAAAAGCTAGGAATTT      | 48,61   |
| sed PR    | TAATGCTATATCTTATAGGG      | 42,23   |
| sed PF    | CTAGTTTGGTAATATCTCCT      | 46,60   |
| see PR    | TAACCTACCGTGGACCCTC       | 50,00   |
| see PF    | TAGATAAAGTTAAAACAAGC      | 38,10   |
| seg PR    | CCAGATTCAAATGCAGAACC      | 57,77   |
| seg PF    | TGCTATCGACACACTACAACC     | 54,93   |
| seh PR    | GACCTTTACTTATTTTCGCTGTC   | 55,23   |
| seh PF    | CGAAAGCAGAAGATTTACACG     | 55,56   |
| sei PR    | CCATATTCTTTGCCTTACCAG     | 55,13   |
| sei PF    | GACAACAAAACCTGTCGAAACTG   | 56,68   |
| sei PR2   | GCCCTAGAGACTTTAAAATT      | 50,37   |
| sej PR    | TCTAGCGGAACAACAGTTCTGA    | 59,37   |
| sej PF    | CAGCGATAGCAAAAATGAAACA    | 56,25   |
| ser PR    | TCACATTGTAGTCAGGTGAACTTCT | 61,30   |
| ser PF    | TGCTATCGACACACTACAACC     | 59,10   |

|        |                       |       |
|--------|-----------------------|-------|
| seo PF | AGTCAAGTGTAGACCCTATT  | 52,64 |
| seo PR | TATGCTCCGAATGAGAATGA  | 53,95 |
| sem PF | CCAATTGAAGACCACCAAAG  | 54,76 |
| sem PR | CTTGTCTGTTCCAGTATCA   | 54,39 |
| sen PF | ATGAAAAAATTAATAAGCA   | 52,57 |
| sen PR | TTATATCGTTTCTTCAG     | 52,53 |
| seu PR | GTGTGACCGAGCATGATGGA  | 60,11 |
| seu PF | TCGCAGCTATGCAGAACAATC | 59,06 |

**SP Table 2.** Source and origin of *Staphylococcus aureus* isolates

| <b>Strain</b> | <b>Hospitalization area</b> | <b>Outpatient area</b> | <b>Sample</b> | <b>Diagnosis</b>                                         |
|---------------|-----------------------------|------------------------|---------------|----------------------------------------------------------|
| <b>40900</b>  | Medical surgery             |                        | Abscess       | Septic hip loosening                                     |
| <b>41026</b>  | Traumatology                |                        | Wound         |                                                          |
| <b>41192</b>  | Hematology                  |                        | Catheter      | Febrile neutropenic                                      |
| <b>41226</b>  | Triage                      |                        | Chest injury  |                                                          |
| <b>41395</b>  |                             | Infectology            | Abscess       |                                                          |
| <b>41399</b>  | Urology                     |                        | Abscess       |                                                          |
| <b>41524</b>  | ICU                         |                        | MiniBAL       | Ventilator-associated infection                          |
| <b>41598</b>  | ICU                         |                        | BAL           | Endovascular pathology, ventilator-associated infection. |
| <b>41627</b>  | Medical surgery             |                        | Blood         | Anemic syndrome                                          |
| <b>41668</b>  |                             | Traumatology           | Knee section  | Cellulitis                                               |
| <b>41674</b>  | Medical surgery             |                        | Drainage      | Weapon wound                                             |
| <b>41759</b>  | Medical surgery             |                        | Blood         |                                                          |
| <b>41762</b>  | Plastic surgery             |                        | Fistula       | Gluteus silicone prosthesis                              |

BAL: Bronchoalveolar lavage

**SP Figure 1. SDS gel of the recombinant *egc* SAg.**

Recombinant *egc* SAgS were purified by affinity and size exclusion chromatography. To evaluate the purity of the recombinant proteins, an electrophoretic chromatography under denaturant conditions (SDS gel) was carried out. The gel was stained with Coomassie blue. As it is showed, one band of proper molecular weight is observed in all cases, except dimmer form for SEO.

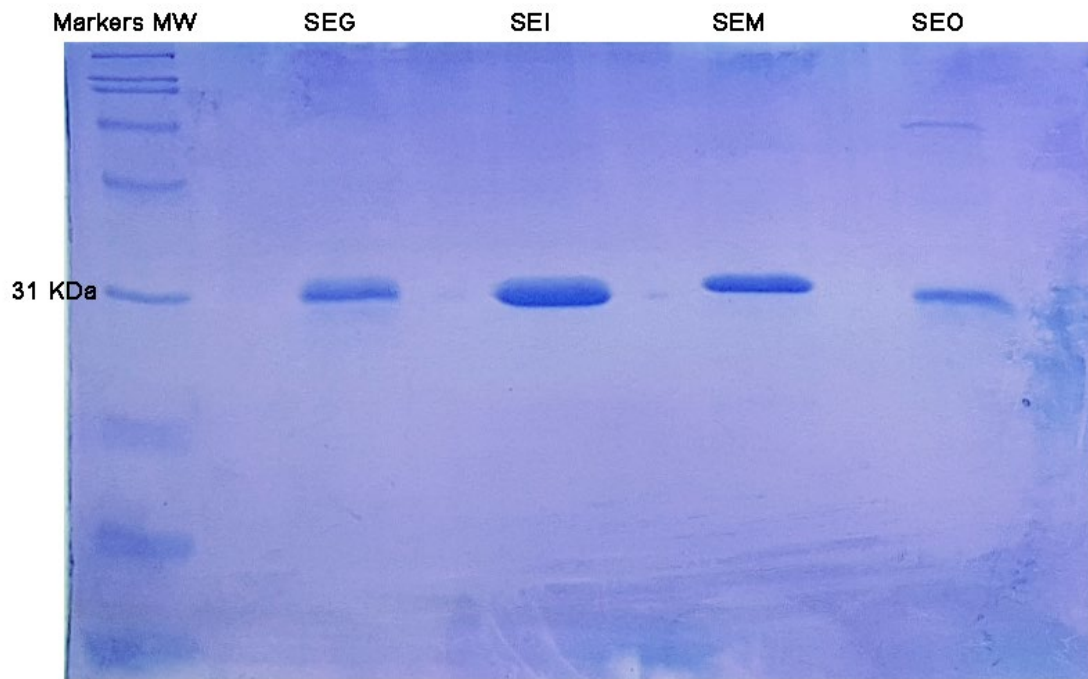

**SP Figure 2. Bacteria phagocytosis by THP-1 cells is not affected by SAgS incubation.** THP-1 cells were incubated with SAgS for 48h and phagocytosis capacity of fluorescent bacteria was measured by flow cytometry. Data are expressed as the mean  $\pm$  SEM of at least three independent experiments. Asterisks represent statistical significance with respect to untreated cells within each treatment: ns= non-significant difference.

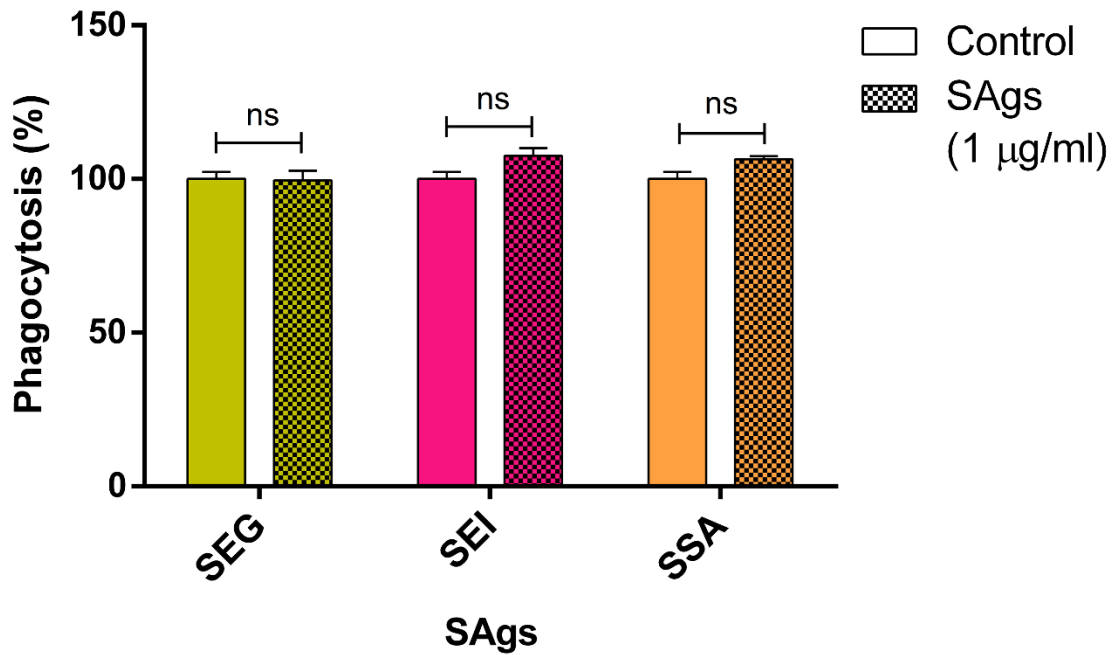

Supplement: Data_Sheet_1.pdf [file Data_Sheet_1.pdf]
